# Supplementary material for: A novel method for the synthesis of the ternary thin film semiconductor cadmium zinc sulfide from acidic chemical baths
Source: Royal Society of Chemistry journal article supplement (doi:10.1039/b005544l), 2000-01-01
Supplement: b005544l.doc [file b005544l.doc]

Supplementary Material

**Table**  Details of some of CBD experiments performed

: Investigation of various chemical bath deposition parameters on (Cd,Zn)S films. Concentrations given in mol dm-3, bath temp. 353K, pH values measured immediately after bath preparation (values in italics were obtained for solutions prepared using freshly recrystallised TAA). (1) Multiple (x3) CBD film growth using sequential ZnS then CdS baths. For (2) the order was reversed. Films were annealed after each run before subsequent deposition. No evidence for Zn as determined from EDAX and XPS measurements in both cases (3) Bath temp 298K (4) Multiple (x3) CBD film growth of (Cd,Zn)S, films annealed after each run. (5) Strong evidence for single ternary formation in XPS and bandgap measurements.

| **[Zn]** | **[Cd]** | **[TAA]** | **[urea]** | **pH** | **Observations** |
| --- | --- | --- | --- | --- | --- |
| 0.01 | 0.01 | 0.5 | 0.4 | 5.486 | Inhomogeneous films |
| 0.01 | 0.01 | 0.2 | 0.4 | 5.577 | Poor, powdery films |
| 0.01 | 0.01 | 0.2 | 0.4 | 3.531 | No films |
| 0.01 | 0.01 | 0.2 | 0.5 | 5.384 | Thin films, orange-yellow hue |
| 0.01 | 0.01 | 0.1 | 0.5 | 5.572 | Poor films |
| 0.01 | 0.01 | 0.05 | 0.5 | 5.544 | Poor films |
| 0.01 | 0.01 | 0.02 | 0.5 | 5.627 | Adequate pale yellow-orange film |
| 0.015 | 0.005 | 0.05 | 0.5 | 5.741 | Adherent yellow film |
| 0.015 | 0.005 | 0.02 | 0.5 | 5.731 | Adherent yellow film |
| 0.01 | 0.005 | 0.02 | 0.5 | 5.726 | Adherent yellow film |
| 0.025 | 0.005 | 0.02 | 0.5 | 5.82 | Adherent pale yellow films |
| 0.02 | 0.02 | 0.1 | 0.5 | 5.95 | Poor powdery films |
| 0.005 | 0.005 | 0.1 | 0.5 | 5.76 | No films |
| 0.01 | 0.01 | 0.1 | 0.5 | 5.75 | Poor thin film |
| 0.02 | 0.02 | 0.2 | 0.5 | 5.70 | No evidence for Zn incorporation (1) |
| 0.02 | 0.02 | 0.1 | 0.5 | 5.70 | (2) |
| 0.01 | 0.01 | 0.2 | 0.5 | 5.70 | Adherent films |
| 0.01 | 0.01 | 0.2 | 0.5 | ~5.7 | No films after 48 h (3) |
| 0.01 | 0.01 | 0.2 | 0.5 | ~5.7 | No films from baths at 323K |
| 0.01 | 0.01 | 0.1 | 0.3 | 5.05 | Poor films |
| 0.01 | 0.01 | 0.2 | 0.5 | *4.20* | Thin powdery films |
| 0.01 | 0.01 | 0.2 | 0.7 | *4.39* | “ |
| 0.02 | 0.01 | 0.2 | 0.5 | *4.494* | “ |
| 0.02 | 0.01 | 0.2 | 0.7 | *4.55* | “ |
| 0.02 | 0.01 | 0.05 | 0.5 | *4.43* | “ |
| 0.01 | 0.01 | 0.02 | 0.3 | *4.41* | “ |
| 0.02 | 0.01 | 0.02 | 0.3 | *4.58* | “ |
| 0.01 | 0.005 | 0.02 | 0.5 | *4.00* | “ |
| 0.01 | 0.01 | 0.02 | 0.5 | *4.01* | “ |
| 0.01 | 0.02 | 0.02 | 0.5 | *4.11* | “ |
| 0.01 | 0.005 | 0.1 | 0.5 | *3.18* | “ |
| 0.01 | 0.01 | 0.1 | 0.5 | *3.27* | “ |
| 0.01 | 0.02 | 0.1 | 0.5 | *3.43* | “ |
| 0.01 | 0.01 | 0.02 | 0.5 | ~5.7 | Adherent specular yellow films (4) |
| 0.02 | 0.01 | 0.02 | 0.5 | ~5.7 | Pale yellow adherent films |
| 0.01 | 0.01 | 0.05 | 0.5 | ~5.7 | Thin but specular films |
| 0.02 | 0.01 | 0.05 | 0.5 | ~5.7 | Thin yellow films |
| 0.002 | 0.018 | 0.2 | 0.5 | 5.70 | Adherent orange-yellow films |
| 0.004 | 0.016 | 0.2 | 0.5 | 5.70 | “ |
| 0.005 | 0.015 | 0.2 | 0.5 | 5.70 | “ |
| 0.006 | 0.014 | 0.2 | 0.5 | 5.70 | “ |
| 0.008 | 0.012 | 0.2 | 0.5 | 5.70 | “ |
| 0.01 | 0.01 | 0.2 | 0.5 | 5.70 | “ |
| 0.012 | 0.008 | 0.2 | 0.5 | 5.70 | “ |
| 0.014 | 0.006 | 0.2 | 0.5 | 5.70 | “ |
| 0.015 | 0.005 | 0.2 | 0.5 | 5.70 | Specular pale orange/yellow films (5) |
| 0.016 | 0.004 | 0.2 | 0.5 | 5.70 | As above (5) |
| 0.018 | 0.002 | 0.2 | 0.5 | 5.70 | Powdery pale yellow films |
